# Supplementary material for: Actionable Alterations for Molecular Targeted Therapy in Esophageal Cancer: An AACR Project GENIE Review
Source: Research Square preprint supplement (doi:10.21203/rs.3.rs-6754101/v1), 2025-05-30
Supplement: Supplementary file 1 [file e4327352dca487d608c7ca56.docx]

| **Supplemental Table 1.** A table of treatment-indicating genomic loci, associated small-molecule therapies according to OncoKB, and the drug class to which the small-molecule therapy (therapies) belong. | | |
| --- | --- | --- |
| **Gene** | **Associated Therapy** | **Drug Class** |
| ABL1 | Imatinib, Dasatinib, Ponatinib, Asciminib, Bosutinib,Nilotinib | ABL kinase inhibitor |
| AKT1 | Capivasertib | AKT inhibitor |
| ALK | Alectinib, Crizotinib, Brigatinib, Ceritinib, Ensartinib, Lorlatinib | ALK inhibitor |
| ARAF | Cobimetinib, Trametinib | MEK inhibitor |
| ATM | Olaparib, Talazoparib | PARP inhibitor |
| ATR | Talazoparib | PARP inhibitor |
| BRAF | Encorafenib, Dabrafenib, Vemurafenib, Tovorafenib | BRAF inhibitor |
| BRCA1 | Olaparib, Niraparib, Rucaparib, Talazoparib | PARP inhibitor |
| BRCA2 | Olaparib, Niraparib, Rucaparib, Talazoparib | PARP inhibitor |
| CDK12 | Olparaib, Talazoparib | PARP inhibitor |
| CDK12 | THZ531, SR4835 | CDK12 inhibitor |
| CHEK1 | Olaparib | PARP inhibitor |
| CHEK2 | Olaparib | PARP inhibitor |
| EGFR | Osimertinib | EGFR inhibitor |
| ERBB2 | Lapatinib, Nertainib, Tucatinib | HER2 inhibitor |
| FGFR1 | Erdafitinib, Pemigatinib | FGFR inhibitor |
| FGFR2 | Erdafitinib, Pemigatinib | FGFR inhibitor |
| FGFR3 | Erdafitinib, Pemigatinib | FGFR inhibitor |
| FLT3 | Capmatinib, Gilteritinib, Quizartinib | FLT3 inhibitor |
| IDH1 | Ivosidenib, Olutasidenib, Vorasidenib | IDH1 inhibitor |
| IDH2 | Enasidenib, Vorasidenib | IDH2 inhibitor |
| JAK2 | Ruxolitinib, Fedratinib | JAK inhibitor |
| KIT | Imatinib | KIT inhibitor |
| KRAS | Adagrasib, Sotorasib | KRAS inhibitor |
| MAP2K1 | Trametinib, Cobimetinib | MEK inhibitor |
| MAP2K2 | Trametinib, Cobimetinib | MEK inhibitor |
| MET | Crizotinib, Entrectinib, Repotrectinib | MET inhibitor |
| MLH1 | Talazoparib | PARP inhibitor |
| NF1 | Mirdametinib, Selumetinib | MEK inhibitor |
| NTRK1 | Larotrectinib, Entrectinib, Repotrectinib | TRK inhibitor |
| NTRK2 | Larotrectinib, Entrectinib, Repotrectinib | TRK inhibitor |
| NTRK3 | Larotrectinib, Entrectinib, Repotrectinib | TRK inhibitor |
| PALB2 | Olaparib, Talazoparib | PARP inhibitor |
| PDGFB | Imatinib | PDGFRB inhibitor |
| PDGFRA | Imatinib | PDGFRA inhibitor |
| PIK3CA | Alpelisib | PI3K inhibitor |
| PTEN | Capivasertib | AKT inhibitor |
| RARA | ATRA + arsenic trioxide | RAR agonist |
| RET | Selpercatinib, Pralsetinib | RET inhibitor |
| ROS1 | Crizotinib, Entrectinib, Repotrectinib | ROS1 inhibitor |
| TSC1 | Everolimus | mTOR inhibito |
| TSC2 | Everolimus | mTOR inhibitor |
